# Supplementary material
Source: publisher site journal article supplement (https://www.dovepress.com/article/318336)
Supplement: Supplementary file 1 [file get_supplementary_file.php]

Supplementary 1

**KAUH Anesthesia Department- Stages of COVID-19 Surge Plan**

|  | **Adult ICU patients** | **Pediatric ICU patients** | **Non-ICU Patients** |
| --- | --- | --- | --- |
| **Stage A** | Adult ICU beds   - **COVID-19 patients;**   MICU (16 beds)   - **Non Covid-19 patients;**   SICU (10 beds) | PICU  (Mixed COVID-19 & NON COVID-19 patients)  (8 beds) | Utilize all department/units beds as usual  (COVID-19 patients will be admitted to Isolation 1 unit, 16 beds). |
| **Stage B** | - **COVID-19 patients;**   B1,CCU (10 beds)  B2, Day Care Unit (Isolation 2)  (36 Beds)   - **Non COVID-19 patients;**   B1, SIMCU  (8 non vented, 5 vented)   - B2, Recovery room   (16 beds) | PCICU  (Mixed COVID-19 & NON COVID-19 patients)  (8 beds) | **Adult patients;**   - **COVID-19 patients**; Day Care Unit (Isolation 2) - **Non COVID-19 patients**; regular floors/units   **N.B.** For pediatric patients;   - **COVID-19 patients;**   Pediatric 1   - **Non COVID-19 patients;**   Pediatric 2 |
| **Stage C** | - **COVID-19 patients;**   3rd floor (male & females)  (total 124 beds)   - **Non COVID-19 patients**;   Merged Patients in 5th Floor.  (58 beds male & 46 beds female); (total 104 beds) | - **COVID-19 patients;**   Pediatric 1;  56 beds (including 12 single rooms)   - **Non COVID-19 patients;**   Pediatric 2;  54 beds (including 12 single rooms) | - **COVID-19 patients;**   3rd floor (male & females)  (total 110 beds)   - **Non COVID-19 patients;**   Merged Patients in 5th Floor.  (58 beds male & 46 beds female); total 104 beds. |
| **Stage D** | - **COVID-19 patients;**   Skill Lab room (62 beds)   - **Non COVID-19 patients;**   OR room: 16 ground, 4 basement, 1 Pediatric cardiac OR); Total 21 beds  ** Keeping at least 3 OR vacant all the time | | - **COVID-19 patients;**   Skill Lab rooms (62 beds)   - **Non COVID-19 patients;**   OB/Gyne can accommodate extra female patients. |
| **Stage E** |  | | Hospital corridors (for non-critical, Non COVID-19 patients) |

Supplementary 2 Airway Management Pathway


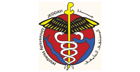

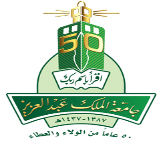


- A total of 7 COVID-19 Airway Trollies are available and ready to be used and mobilized.
- Upgraded PPEs including face shield and N95 masks must be used by AW Team.
- Cross check of proper “Donning” between team members should be done.
- Medications to be dispensed from the Omnicell located at the front Desk.
- Please refer to the checklists attached to the Trolley (also available in the presented department CCC PLAN attachment section).

**Post intubation patient care**

Will be handed over to Rapid Response Team & Respiratory Therapist

**Intubate**

- Follow COVID-19 airway management guidelines.
- RSI in all patients (limit BMV unless unavoidable).
- Use Vidoelaryngoscope for all intubation.
- Avoid circuit disconnections (if needed: ventilator on stand-by/clamp endotracheal tube).

**Proper Doffing**

- Fill the anaesthesia record and RRT record
- Documentation should be done outside the Room
- Keep the records in the patients file

**Proper Donning (Airborne precautions)**

- Minimize the number of personnel in the room
- Leave Airway cart outside the room
- Check monitoring, vascular access, instruments, drugs, suction and videolaryngoscope.
- Leave all papers forms outside the room

**Role of Anesthetist:**

- Respond to call
- AW Team leader
- Prepare medications

**Role of Technician:**

- Bring COVID-19 Trolley + Glidoscope
- Assist intubation

**Role of Unit Nurse:**

- Prepare PPE Trolley
- Connect the patient to monitor

**Role of Respiratory Therapist:**

- Prepare ventilator and connect suction

**Pre-intubation assessment**

Condition, history, allergies…etc..

**Patient stable?**

Decision need to be made prior to contacting Airway Team

**YES**

**(Urgent Intubation)**

Move to Negative Pressure Room “Isolation” or ICU

**NO**

**(Emergency Intubation)**

At the patient’s current location with HEPA filter

**Department of Anesthesia & Critical Care**

**COVID-19 Airway Management Plan**

Supplementary 3 Intubation Checklist
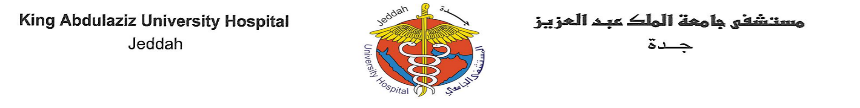


| Department COVID-19 Airway Management Checklist | | | | | |
| --- | --- | --- | --- | --- | --- |
| Check Before Entering the Room | | | | | |
| Team | **Patient** | **Drugs** | **Equipment** | | |
| - Anesthesia Team   - Intubator   - A/W Assistant (Technician)   - 2nd Assistant   - Outside Runner   - Documentation charter - Respiratory Therapist   - Set up ventilator - Ward Nurse   - Connect the patient to monitors   - Observe proper donning/doffing | - Pre-intubation assessment - Reliable IV Access - Monitors attached - HEPA Filter if the room is not a negative pressure room | - Known Allergies   - Yes   - No - SUX Contraindicated   - Yes   - No   - Drugs:   - Ketamine   - Succinylcholine   - Rocuronium   - Phenylephrine   - Atropine | - Proper size facemask - Ambu Bag - Glidescope/ McGrath - Laryngescope x2 sizes - Different sizes ETTs - Different sizes LMAs - Bougie/Stylet - 10 ml Syringe - Tube fixation/tape - Tube clamp - Tube lubricant - Colorimetric CO2 detector - HME filterx2 | | - Oral airway (OPA) - Kidney dish - Magill Forceps - NGT - Quick Trach kit - Double plastic yellow bags for discarding used items - PPE: - Surgical gown - Yellow gown - Gloves - Shoe cover - Faceshield |
| Final Check in the Room | | | | | |
| - Team properly donned all time - Room door should be closed at all time - Monitors are connected and patient’s position is optimal - Suction is working and switched on - Working oxygen source - IV Access is patent and fluid is connected with free port | | - **Airway Plans**   - Plan A: Video Laryngoscopy with stylet   - Plan B: Supraglottic Airway   - Plan C: tight seal two hand face mask with OPA and lowest FGF possible   - Plan D: Cricothyrotomy | | | |
| Final Check after Intubation | | | | | |
| Inside the Patients Room | | **Outside the Room** | | | |
| - Proper inflation of the cuff - Confirmation of ETCO2 and tube fixation - Patient is vitally stable +/- Insert NGT - Proper disposal of used items in double plastic bag - Handover the patient to respiratory therapist to connect to the ventilator | | - Proper doffing - Wash the hands and sanitize - Complete charting   - Anesthesia Record - Handover the patient to RRT/ICU team | | - RRT Form | - Airway team log |
